# Supplementary material
Source: PubMed Central journal article supplement (PMC6560276)

**NSTI score**

0.09  
0.06  
0.03

Phyllostomidae

Thraupidae

**Host Family**

**Diet**

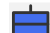

not hematophagous

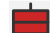

hematophagous

\*

ns

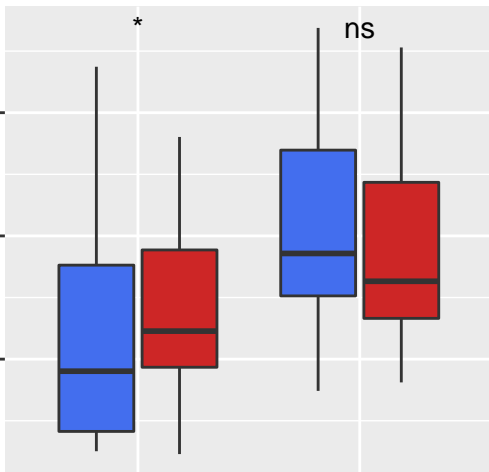

Supplement: rstb20180249supp1.pdf [file rstb20180249supp1.pdf]
